# Supplementary material
Source: PubMed Central journal article supplement (PMC3000990)
Supplement: supp_M110.184457_jbc.M110.184457-1.pdf [file supp_M110.184457_jbc.M110.184457-1.pdf]

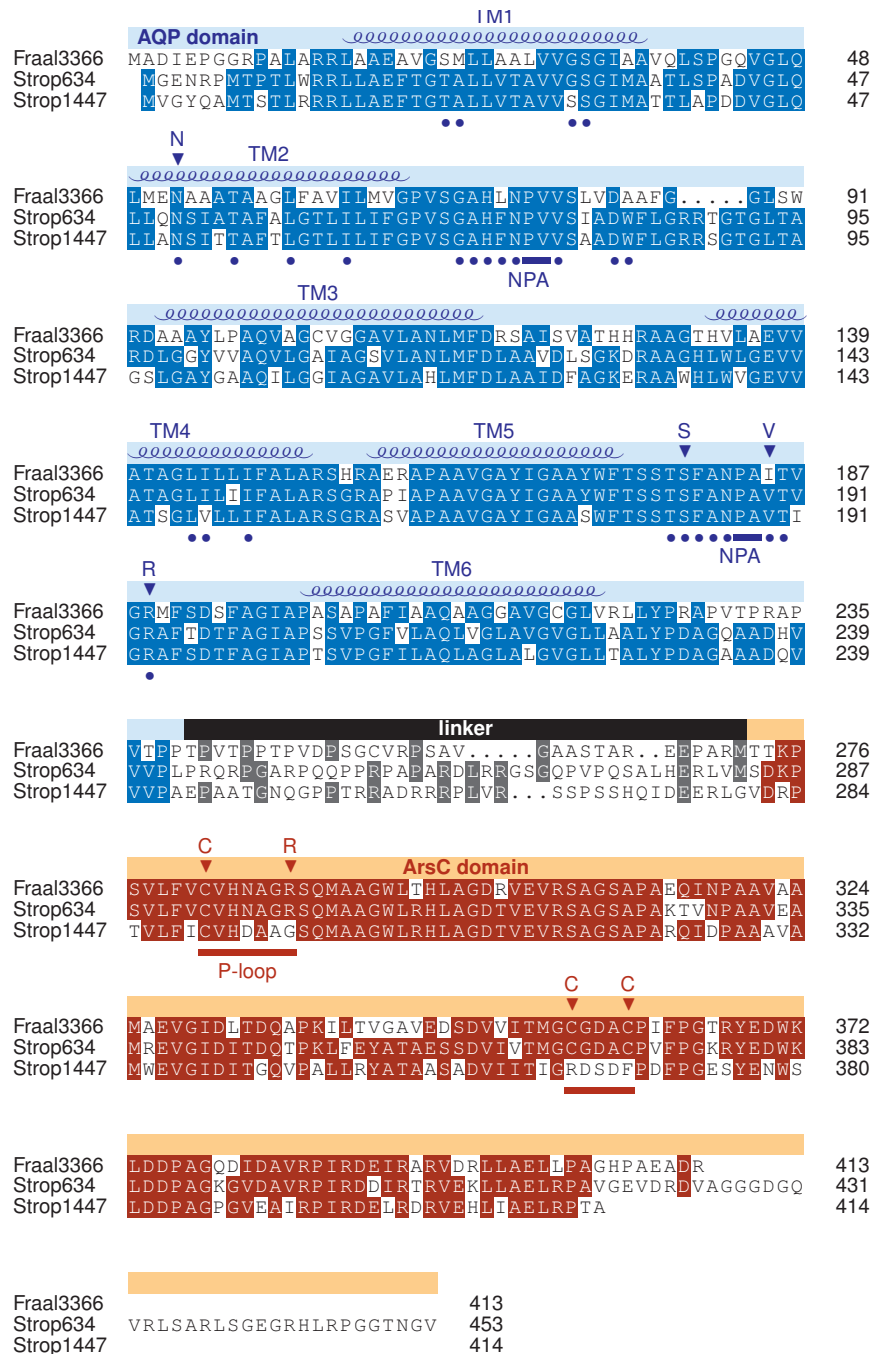

**Fig. S1.** Alignment of aquaglyceroporin-ArsC fusion proteins from *F. alni* (Fraal3366) and *S. tropica* (Strop634, Strop1447). Labelled are the putative transmembrane domains (TM1-6), the NPA-motifs, the channel-lining residues (blue dots), the residues of the aromatic/arginine selectivity filter (blue triangles), the linker region, and the catalytic domains (red bars) as well as residues in the ArsC domain (red triangles).

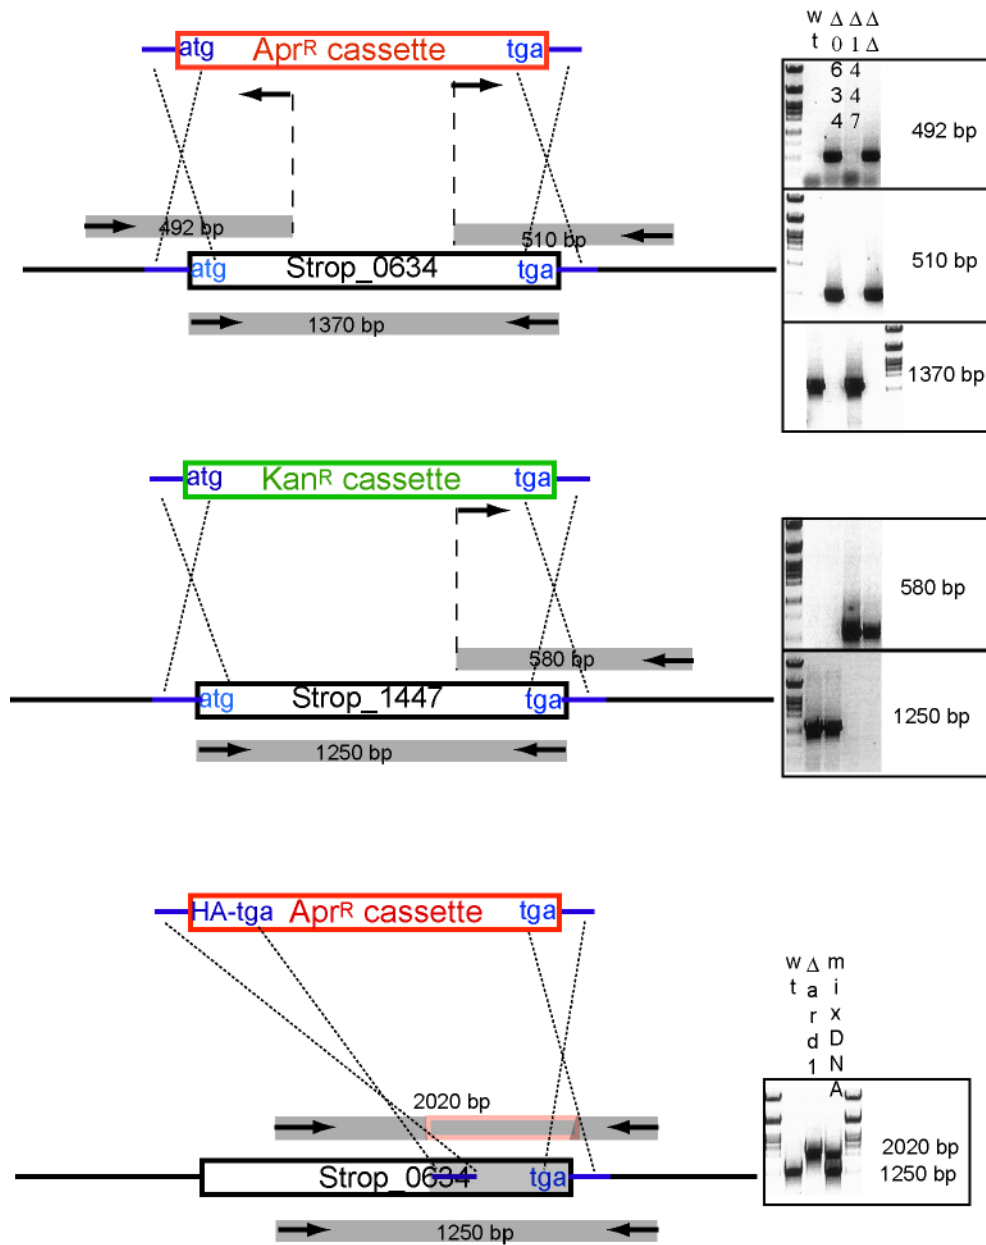

**Fig. S2.** Confirmation by PCR of correct gene targeting in *S. tropica* deletion strains, see Materials and Methods for details.  $\Delta 0634$  denotes the *strop634* deletion strain,  $\Delta 1447$  the *strop1447* deletion,  $\Delta\Delta$  the double deletion, and  $\Delta ard1$  the partial deletion of *strop634* leaving the channel domain intact and removing the ArsC domain alone.

### Yeast strains

| Strain                                      | Genotype                                                               | Source     |
|---------------------------------------------|------------------------------------------------------------------------|------------|
| BY4742                                      | MAT $\alpha$ his3-1, leu2 $\Delta$ 0, lys2 $\Delta$ 0, ura3 $\Delta$ 0 | EUROSCARF  |
| $\Delta$ fps1                               | BY4742, yll043w::KanMX                                                 | EUROSCARF  |
| $\Delta$ acr2                               | BY4742, ypr200c::kanMX4                                                | EUROSCARF  |
| $\Delta$ acr2,3                             | BY4742, acr2,3::LEU2                                                   | This study |
| $\Delta$ fps1 $\Delta$ acr2,3               | BY4742, yll043w::KanMX, acr2,3::LEU2                                   | This study |
| $\Delta$ fps1 $\Delta$ acr2,3 $\Delta$ ycf1 | BY4742, yll043w::KanMX, acr2,3::LEU2, ycf1::HIS3                       | This study |

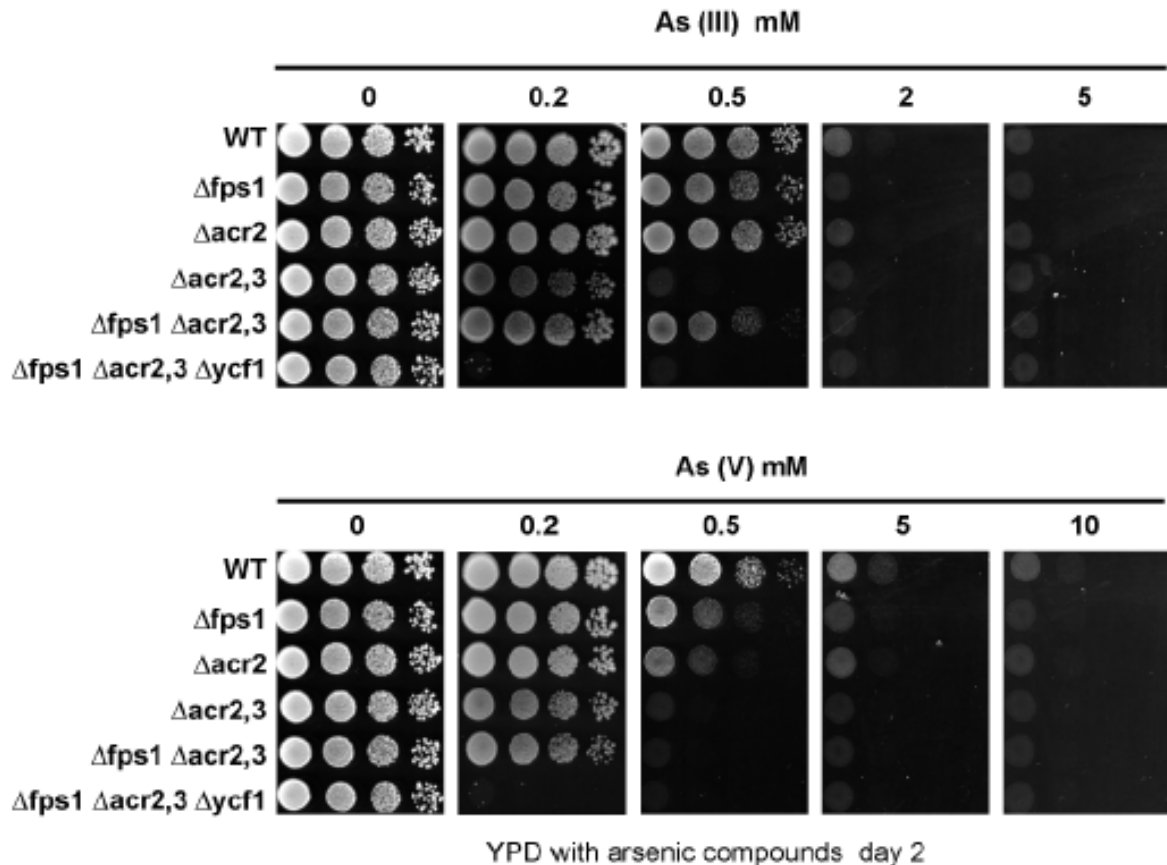

**Fig. S3.** Yeast strains used in this study and their sensitivity for arsenite and arsenate monitored after 3 days, see Materials and Methods for details. Note that apparent differences in the sensitivity levels compared to Fig. 2 in the main text are solely due to a shorter observation period of only 3 days vs. 4 days.

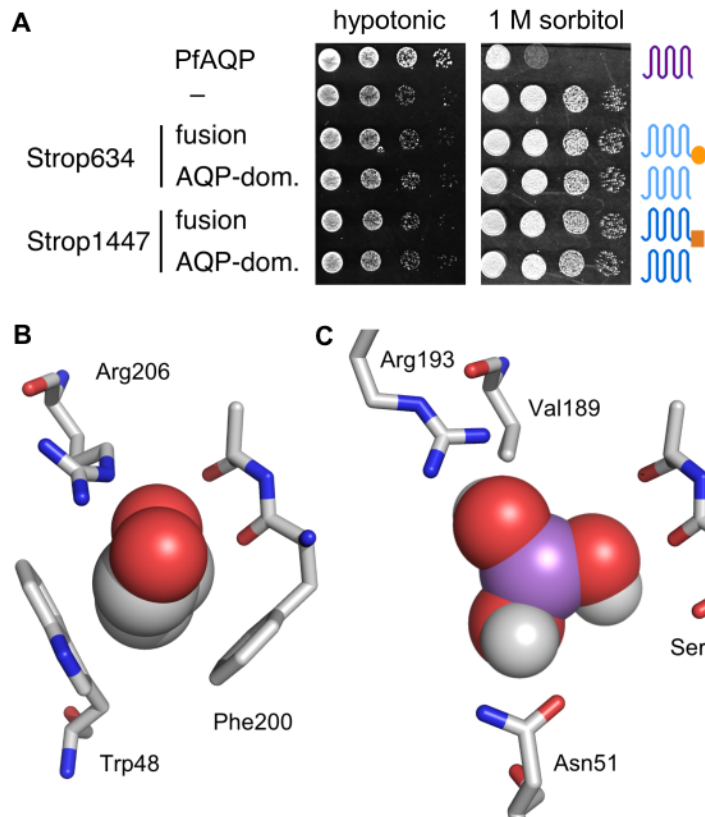

**Fig. S4.** Insufficient glycerol permeability of Strop634 and Strop1447 and structure model of the aromatic/arginine selectivity filter. **A.** Yeast cells lacking the endogenous aquaglyceroporin ( $\Delta fps1$ ) and expressing PfAQP, Strop634 or Strop1447 full-length proteins or the channel domains alone were grown overnight in selective liquid medium (SD -Ura) containing 1 M glycerol in order to increase the internal osmolarity. The cells were then spotted in serial dilutions on hypotonic agar medium (left panel) or on isotonic agar medium supplemented with 1 M non-permeating sorbitol (right panel) (for details see: Uzcatagui NL, et al. (2004) Cloning, heterologous expression and characterization of three aquaglyceroporins from *Trypanosoma brucei*. *J Biol Chem* **279**: 42669-42676). Under hypotonic conditions (left panel), functional glycerol channels permit rapid adjustment of the internal osmolarity by release of glycerol sustaining cell growth (see control aquaglyceroporin PfAQP). Yet, Strop634 and Strop1447 did not increase growth over the non-expressing control cells. Under isotonic 1 M sorbitol conditions (right panel), functional aquaglyceroporins will release glycerol due to the outward chemical glycerol gradient, yet, sorbitol cannot permeate the cell membrane. The resulting hyperosmotic stress will drain water out of the cells and inhibit growth (see PfAQP control). Again, Strop634 and Strop1447 were non-functional. Both assays indicate absent or too low glycerol permeability of Strop634 and Strop1447 to complement the *Fps1*-deletion phenotype. **B.** Shown is the aromatic/arginine selectivity filter of the *E. coli* aquaglyceroporin (PDB # 1FX8) which is virtually identical to that of PfAQP (PDB # 3C02) and **C.** a model of the respective Strop634 region.

medium supplemented with 1 M non-permeating sorbitol (right panel) (for details see: Uzcatagui NL, et al. (2004) Cloning, heterologous expression and characterization of three aquaglyceroporins from *Trypanosoma brucei*. *J Biol Chem* **279**: 42669-42676). Under hypotonic conditions (left panel), functional glycerol channels permit rapid adjustment of the internal osmolarity by release of glycerol sustaining cell growth (see control aquaglyceroporin PfAQP). Yet, Strop634 and Strop1447 did not increase growth over the non-expressing control cells. Under isotonic 1 M sorbitol conditions (right panel), functional aquaglyceroporins will release glycerol due to the outward chemical glycerol gradient, yet, sorbitol cannot permeate the cell membrane. The resulting hyperosmotic stress will drain water out of the cells and inhibit growth (see PfAQP control). Again, Strop634 and Strop1447 were non-functional. Both assays indicate absent or too low glycerol permeability of Strop634 and Strop1447 to complement the *Fps1*-deletion phenotype. **B.** Shown is the aromatic/arginine selectivity filter of the *E. coli* aquaglyceroporin (PDB # 1FX8) which is virtually identical to that of PfAQP (PDB # 3C02) and **C.** a model of the respective Strop634 region.

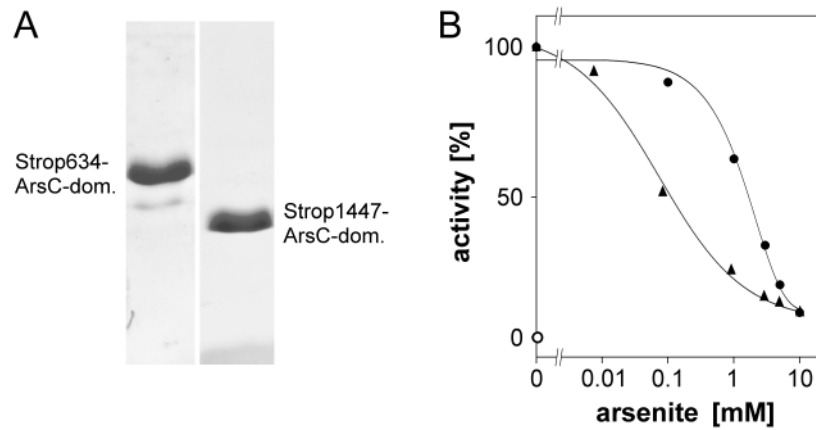

**Fig. S5.** Expression of the Strop634 and Strop1447 ArsC domains and sensitivity of thioredoxin reductase for arsenite. **A.** Coomassie stain of the affinity purified ArsC domains (19 and 15 kD, resp.). **B.** Inhibition of the Strop634/thioredoxin/thioredoxin reductase cascade by arsenite (filled circles). Thioredoxin reductase activity with 5,5'-Dithio-Bis (2-Nitrobenzoic Acid) as a substrate (filled triangles) was highly sensitive to arsenite identifying this enzyme rather than the Strop634 ArsC domain as the main target for arsenite inhibition.

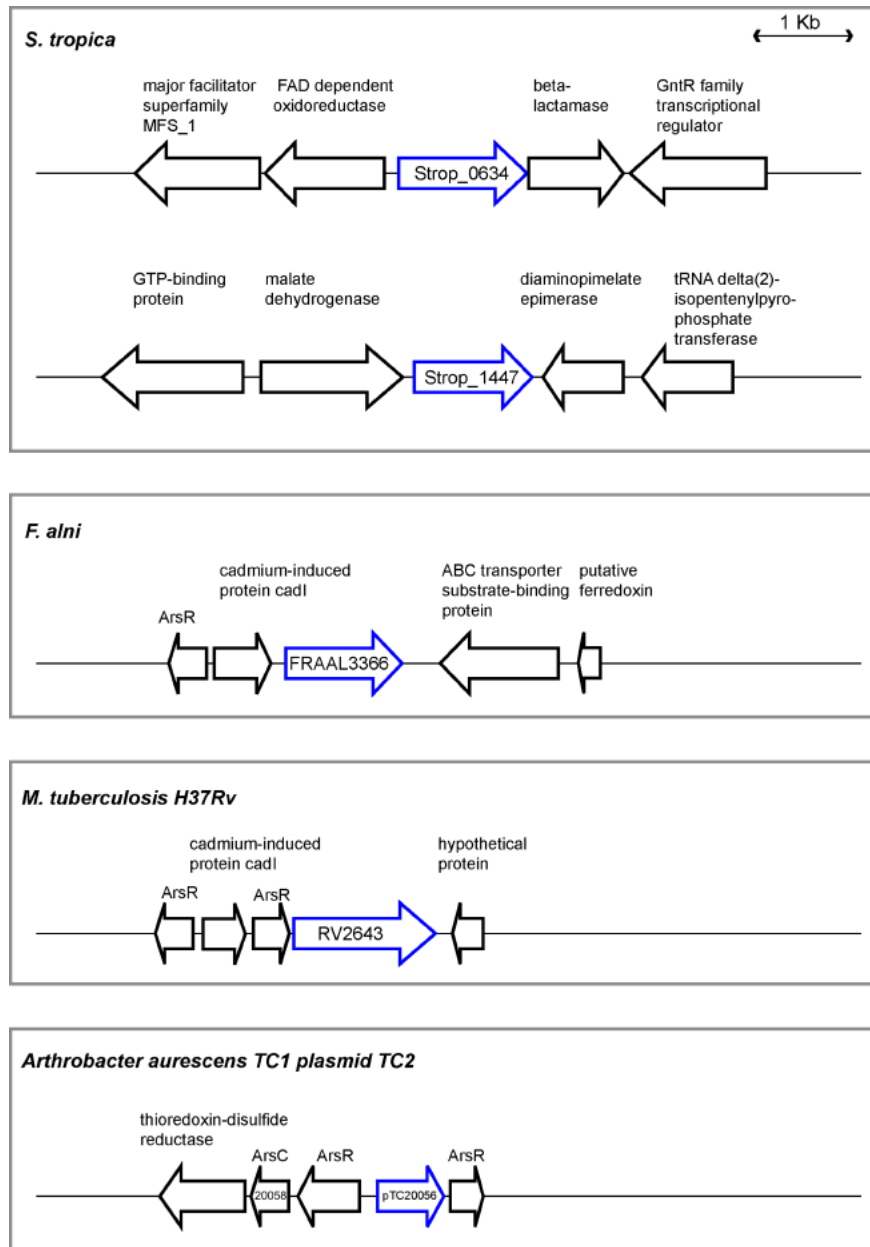

**Fig. S6.** Genetic environment of arsenite channel-ArsC fusion genes in *S. tropica*, *F. alni*, and *M. tuberculosis*. Pre-fusion homologues of the Strop634 channel and enzyme domain are clustered on an *A. aurescens* plasmid (pTC20058 and pTC20060). ArsR denotes a transcriptional regulator responding to arsenate exposure.
